# Supplementary material
Source: publisher figshare collection journal article supplement (https://karger.figshare.com/ndownloader/files/24193034)
Supplement: Supplementary file 1 [file 24193034]

**Supplementary Table S1.** Detailed updosing schedules in the induction phase for the three protocol types.

| **Cluster VIT Protocol** | | | | |
| --- | --- | --- | --- | --- |
|  | **Concentration (µg venom/ml)** | **Volume (ml)** | **Dose (µg venom/ml)** | **Interval** |
| **Day 1** | 10 µg/ml | 0.5 ml | 5 µg | 30 min |
| 10 µg/ml | 1.0 ml | 10 µg |
| 100 µg/ml | 0.2 ml | 20 µg |
| 100 µg/ml | 0.2 ml | 20 µg |
| **Day 8** | 100 µg/ml | 0.3 ml | 30 µg | 60 min |
| 100 µg/ml | 0.3 ml | 30 µg |
| 100 µg/ml | 0.4 ml | 40 µg |
| **Day 22** | 100 µg/ml | 0.5 ml | 50 µg | 30 min |
| 100 µg/ml | 0.5 ml | 50 µg |
| Nine injections, cumulative venom dose: 255 µg | | | | |
|  | | | | |
| **Rush VIT Protocol** | | | | |
|  | **Concentration (µg venom/ml)** | **Volume (ml)** | **Dose (µg venom/ml)** | **Interval** |
| **Day 1** | 0.1 µg/ml | 0.1 ml | 0.01 µg | 30 min |
| 1 µg/ml | 0.1 ml | 0.1 µg |
| 10 µg/ml | 0.1 ml | 1 µg |
| 10 µg/ml | 0.5 ml | 5 µg |
| **Day 2** | 100 µg/ml | 0.1 ml | 10 µg | 2 h |
| 100 µg/ml | 0.2 ml | 20 µg |
| 100 µg/ml | 0.4 ml | 40 µg |
| 100 µg/ml | 0.6 ml | 60 µg |
| **Day 3** | 100 µg/ml | 0.8 ml | 80 µg | 2 h |
| 100 µg/ml | 1.0 ml | 100 µg |
| Day 4* | 100 µg/ml | 1.0 ml | 100 µg | 2 h |
| 100 µg/ml | 1.0 ml | 100 µg |
| Ten injections, cumulative venom dose: 316.11 µg (three days) | | | | |
|  |  |  |  |  |
| **Ultra-rush VIT Protocol** | | | | |
|  | **Concentration (µg venom/ml)** | **Volume (ml)** | **Dose (µg venom/ml)** | **Interval** |
| **Day 1** | 1 µg/ml | 0.1 ml | 0.1 µg | 30 min |
| 10 µg/ml | 0.1 ml | 1 µg | 30 min |
| 100 µg/ml | 0.1 ml | 10 µg | 30 min |
| 100 µg/ml  100 µg/ml  100 µg/ml | 0.2 ml  0.3 ml  0.5 ml | 20 µg  30 µg  50 µg | 60 min  60 min  end |
| Six injections, cumulative venom dose: 111.1 µg | | | | |

**Injections on day four of the rush protocol were administered only when an increased maintenance dose of 200 µg was required*
